# Supplementary material for: The venom gland transcriptome of the Desert Massasauga Rattlesnake (Sistrurus catenatus edwardsii): towards an understanding of venom composition among advanced snakes (Superfamily Colubroidea)
Source: PubMed Central journal article supplement (PMC2242803; doi:10.1186/1471-2199-8-115), 2007-12-20
Supplement: 1471-2199-8-115-S1.pdf [file 1471-2199-8-115-S1.pdf]

| <b>COLUBROIDEA</b>                     |                   |                 |                        |                  |
|----------------------------------------|-------------------|-----------------|------------------------|------------------|
|                                        | <b>Colubridae</b> | <b>Elapidae</b> | <b>Atractaspididae</b> | <b>Viperidae</b> |
| <b>ENZYMATIC</b>                       |                   |                 |                        |                  |
| Metalloproteinase                      | +                 | +               | +                      | +                |
| PLA <sub>2</sub>                       | +                 | +               |                        | +                |
| LAO                                    | +                 | +               |                        | +                |
| Serine proteinase                      | +                 |                 |                        | +                |
| Serine proteinase related to factor Xa |                   | ⊕               |                        |                  |
| Phosphodiesterase                      | +                 | +               |                        | +*               |
| Acetylcholineesterase                  | +                 | +               |                        |                  |
| Hyaluronidase                          |                   | ⊕               |                        |                  |
| Dipeptidyl peptidase                   |                   |                 |                        | ⊕                |
| <b>NON-ENZYMATIC</b>                   |                   |                 |                        |                  |
| Sarafotoxin                            |                   |                 | ⊕                      |                  |
| Disintegrin                            |                   |                 |                        | ⊕                |
| VEGF                                   |                   |                 |                        | ⊕                |
| NGF                                    |                   | +               |                        | +                |
| 3FTx                                   | +                 | +               |                        | +*               |
| CLP                                    | +                 | +               |                        | +                |
| CRISP                                  | +                 | +               |                        | +                |
| BPP-CNP                                | +                 | +               |                        | +                |
| Kunitz/BPTI                            |                   | +               |                        | +                |
| Vespryns                               |                   | +               |                        | +                |
| Cobra venom factor                     |                   | ⊕               |                        |                  |
| AVIT peptide                           |                   | ⊕               |                        |                  |
| Wapryns                                |                   | ⊕               |                        |                  |
| Cystatin                               |                   |                 |                        | ⊕                |
| Crotamine                              |                   |                 |                        | ⊕                |
| Waglerin                               |                   |                 |                        | ⊕                |
| Novel toxin (Kunitz/BPTI + Wapryns)    |                   |                 |                        | ⊕*               |

This table has been compiled collecting the reports for the presence of either gene sequence encoding toxin or pharmacological activity in the venom. Positive circles mark the presence of a family of toxin to a particular snake family. Asterisk marks report the interesting family of toxins which are identified from this work.
