# Supplementary material for: The venom gland transcriptome of the Desert Massasauga Rattlesnake (Sistrurus catenatus edwardsii): towards an understanding of venom composition among advanced snakes (Superfamily Colubroidea)
Source: PubMed Central journal article supplement (PMC2242803; doi:10.1186/1471-2199-8-115), 2007-12-20
Supplement: 1471-2199-8-115-S2.pdf [file 1471-2199-8-115-S2.pdf]

| Cluster                                    | Number of clones | Putative identity                                                               |
|--------------------------------------------|------------------|---------------------------------------------------------------------------------|
| <b>Serine proteinases</b>                  |                  |                                                                                 |
| SCESP1                                     | 31               | Calobin precursor                                                               |
| SCESP2                                     | 27               | Catroxase I precursor                                                           |
| SCESP3                                     | 15               | Catroxase II precursor                                                          |
| SCESP4                                     | 13               | Serine proteinase 3 precursor                                                   |
| SCESP5                                     | 11               | Acubin 2 precursor                                                              |
| SCESP6                                     | 06               | Gyroxin-like B2.1 precursor                                                     |
| SCESP7                                     | 06               | Salmonase precursor                                                             |
| SCESP8                                     | 06               | Venom serine protease 5 precursor                                               |
| SCESP9                                     | 05               | Venom serine protease 1 precursor                                               |
| SCESP10                                    | 03               | Preprotrimubin mRNA precursor                                                   |
| SCESP11                                    | 02               | Serine protease KN9 precursor                                                   |
| SCESP12                                    | 02               | Hypothetical serine protease                                                    |
| SCE144                                     | 01               | <i>Trimeresurus gramineus</i> mRNA for serine protease                          |
| SCE343                                     | 01               | Serine protease CL4 precursor                                                   |
| SCE408                                     | 01               | Putative serine proteinase (sp1 gene)                                           |
| SCE395                                     | 01               | Serine protease KN7 precursor                                                   |
| SCE435                                     | 01               | <i>Trimeresurus flavoviridis</i> serine protease                                |
| SCE488                                     | 01               | <i>Gloydus saxatilis</i> thrombin-like enzyme                                   |
| <b>Metalloproteinases and Disintegrins</b> |                  |                                                                                 |
| SCEMP1                                     | 22               | <i>Agkistrodon metalloproteinase</i> -disintegrin-like protein                  |
| SCEMP2                                     | 04               | Hemorrhagic metalloproteinase HR1a precursor                                    |
| SCEMP3                                     | 03               | Hemorrhagic metalloproteinase HF3 precursor                                     |
| SCEMP4                                     | 03               | Atrolysin a precursor                                                           |
| SCEMP5                                     | 02               | <i>Bothrops jararacussu</i> BOJUMET II precursor                                |
| SCEMP6                                     | 02               | <i>Agkistrodon contortrix contortrix</i> acostatin beta chain                   |
| SCE456                                     | 01               | Vascular apoptosis-inducing protein 1 precursor                                 |
| SCE062                                     | 01               | Insularinase and insularin precursor                                            |
| SCE284                                     | 01               | <i>Agkistrodon contortrix</i> metalloproteinase precursor                       |
| SCE389                                     | 01               | <i>Gloydus saxatilis</i> metalloproteinase precursor                            |
| SCE409                                     | 01               | <i>Bothrops insularis</i> metalloproteinase precursor                           |
| SCE422                                     | 01               | <i>Vipera stejnegeri</i> stejnihagin-A                                          |
| SCE425                                     | 01               | <i>Gloydus halys</i> metalloprotease (Mt-a) precursor                           |
| SCE157                                     | 01               | <i>Trimeresurus flavoviridis</i> metalloproteinase                              |
| <b>Phospholipase A<sub>2</sub></b>         |                  |                                                                                 |
| SCEPLA <sub>2</sub>                        | 84               | <i>Sistrurus catenatus</i> tergeminus PLA <sub>2</sub> precursor                |
| SCE039                                     | 01               | <i>Bothrops insularis</i> cluster BITP01A PLA <sub>2</sub> precursor            |
| SCE070                                     | 01               | <i>Crotalus viridis viridis</i> strain E6e PLA <sub>2</sub> precursor           |
| SCE117                                     | 01               | Snake BP-II gene for phospholipase A <sub>2</sub>                               |
| SCE135                                     | 01               | <i>Trimeresurus gramineus</i> gTgPLA6a gene for PLA <sub>2</sub>                |
| SCE295                                     | 01               | <i>Trimeresurus stejnegeri</i> PLA <sub>2</sub> isozyme Ts-A3 mRNA              |
| SCE367                                     | 01               | <i>Crotalus durissus terrificus</i> mRNA for crotoxin A                         |
| SCE376                                     | 01               | <i>Trimeresurus stejnegeri</i> PLA <sub>2</sub> isozyme Ts-A3 mRNA              |
| SCE403                                     | 01               | <i>Crotalus viridis viridis</i> strain E6e PLA <sub>2</sub> precursor           |
| SCE404                                     | 01               | <i>Trimeresurus stejnegeri</i> PLA <sub>2</sub> isozyme Ts-A3 mRNA              |
| SCE405                                     | 01               | <i>Bothrops insularis</i> cluster BITP01A PLA <sub>2</sub> precursor            |
| SCE417                                     | 01               | <i>Crotalus durissus terrificus</i> mRNA for crotoxin A                         |
| SCE445                                     | 01               | <i>Bothrops jararacussu</i> myotoxic A <sub>2</sub> -like PLA <sub>2</sub> mRNA |
| SCE235                                     | 01               | Snake pgPLA2a gene for phospholipase A <sub>2</sub>                             |
| SCE241                                     | 01               | <i>Bothrops jararacussu</i> myotoxic A <sub>2</sub> -like PLA <sub>2</sub> mRNA |
| SCE411                                     | 01               | <i>Crotalus durissus terrificus</i> crotoxin, CB subunit                        |

|                                                                         |    |                                                                             |
|-------------------------------------------------------------------------|----|-----------------------------------------------------------------------------|
| <b>Phosphodiesterase</b>                                                |    |                                                                             |
| SCE269                                                                  | 01 | <i>Mus musculus</i> ectonucleotide phosphodiesterase 3                      |
| <b>L-Amino acid oxidase</b>                                             |    |                                                                             |
| SCELAO                                                                  | 13 | L-amino acid oxidase precursor                                              |
| <b>C-type lectins</b>                                                   |    |                                                                             |
| SCECLP1                                                                 | 03 | <i>Agkistrodon blomhoffi</i> mamushigin beta                                |
| SCE049                                                                  | 01 | <i>Trimeresurus flavoviridis</i> factor IX/factor X binding protein A chain |
| SCE328                                                                  | 01 | <i>Trimeresurus stejnegeri</i> stejaggregin-B beta chain-1 mRNA             |
| <b>Growth factors</b>                                                   |    |                                                                             |
| SCEGF1                                                                  | 17 | <i>Bothrops insularis</i> VEGF precursor                                    |
| SCE302                                                                  | 01 | <i>Protobothrops mucrosquamatus</i> VEGF precursor                          |
| SCE373                                                                  | 01 | <i>Bothrops jararaca</i> VEGF precursor                                     |
| SCE419                                                                  | 01 | <i>Trimeresurus flavoviridis</i> VEGF precursor                             |
| SCE468                                                                  | 01 | <i>Protobothrops mucrosquamatus</i> VEGF precursor                          |
| SCE467                                                                  | 01 | <i>Crotalus durissus terrificus</i> NGF precursor                           |
| SCE339                                                                  | 01 | similar to connective tissue growth factor <i>Gallus gallus</i>             |
| <b>CRISP</b>                                                            |    |                                                                             |
| SCECRISP1                                                               | 20 | <i>Crotalus atrox</i> catrin mRNA                                           |
| SCE052                                                                  | 01 | <i>Trimeresurus jerdonii</i> cysteine-rich venom protein                    |
| SCE322                                                                  | 01 | <i>Agkistrodon piscivorus piscivorus</i> piscivorin mRNA                    |
| SCE352                                                                  | 01 | <i>Agkistrodon blomhoffi</i> ablomin mRNA                                   |
| SCE391                                                                  | 01 | <i>Trimeresurus jerdonii</i> cysteine-rich venom protein                    |
| SCE407                                                                  | 01 | <i>Trimeresurus mucrosquamatus</i> cysteine-rich protein                    |
| SCE431                                                                  | 01 | <i>Trimeresurus flavoviridis</i> triflin mRNA                               |
| SCE268                                                                  | 01 | <i>Agkistrodon blomhoffi</i> ablomin mRNA                                   |
| SCE394                                                                  | 01 | <i>Trimeresurus jerdonii</i> cysteine-rich venom protein                    |
| <b>Bradykinin-potentiating peptides and C-type natriuretic peptides</b> |    |                                                                             |
| SCE492                                                                  | 01 | BPP and CNP precursor                                                       |
| <b>Three finger toxin</b>                                               |    |                                                                             |
| SCE164                                                                  | 01 | <i>Naja atra</i> gene for cardiotoxin 10                                    |
| SCE215                                                                  | 01 | <i>Bungarus multicinctus</i> mRNA for neurotoxin                            |
| SCE390                                                                  | 01 | <i>Naja naja atra</i> mRNA for cobrotoxin homolog                           |
| <b>Novel toxin</b>                                                      |    |                                                                             |
| SCE290                                                                  | 01 | <i>Vipera ammodytes</i> trypsin inhibitor preproprotein                     |
| <b>Iron binding protein</b>                                             |    |                                                                             |
| SCEHYPO1                                                                | 04 | <i>Lamprophis fuliginosus</i> mRNA for iron binding protein                 |
