# Supplementary material for: The venom gland transcriptome of the Desert Massasauga Rattlesnake (Sistrurus catenatus edwardsii): towards an understanding of venom composition among advanced snakes (Superfamily Colubroidea)
Source: PubMed Central journal article supplement (PMC2242803; doi:10.1186/1471-2199-8-115), 2007-12-20
Supplement: 1471-2199-8-115-S3.pdf [file 1471-2199-8-115-S3.pdf]

| Cluster                                          | Number of clones | Putative identity                                   |
|--------------------------------------------------|------------------|-----------------------------------------------------|
| <b>General metabolism</b>                        |                  |                                                     |
| SCE008                                           | 01               | Glycerol-3-phosphate dehydrogenase 1                |
| SCE014                                           | 01               | Glyoxylase 1                                        |
| SCE055                                           | 01               | Cytochrome oxidase subunit VIII(H)                  |
| SCE063                                           | 01               | Cytochrome P450 1A5                                 |
| SCE100                                           | 01               | Cytochrome c oxidase subunit VIIIb precursor        |
| SCE121                                           | 01               | Cytochrome C oxidase copper chaperone               |
| SCE178                                           | 01               | Phosphoribosylaminoimidazole carboxylase            |
| SCE154                                           | 01               | Similar to V-ATPase C2 subunit                      |
| SCE427                                           | 01               | S-adenosylmethionine decarboxylase 1                |
| SCE491                                           | 01               | Short chain dehydrogenase                           |
| SCE264                                           | 01               | Similar to NADH dehydrogenase (ubiquinone) 1        |
| SCE092                                           | 01               | ATP synthase beta chain                             |
| SCE452                                           | 01               | Ferritin                                            |
| <b>Transcription and translation apparatus</b>   |                  |                                                     |
| SCERP1                                           | 02               | 40S ribosomal protein S4                            |
| SCERP2                                           | 02               | 40S ribosomal protein SA (p40) (laminin receptor)   |
| SCE500                                           | 01               | Ribosomal protein L36a isoform 1                    |
| SCE501                                           | 01               | Ribosomal protein S29 isoform 1                     |
| SCE502                                           | 01               | Ribosomal protein L37                               |
| SCE503                                           | 01               | Ribosomal protein S26                               |
| SCE504                                           | 01               | Ribosomal protein L23                               |
| SCE505                                           | 01               | Ribosomal protein S27a                              |
| SCE506                                           | 01               | Ribosomal protein L19 variant                       |
| SCE507                                           | 01               | 40S ribosomal protein S14                           |
| SCE508                                           | 01               | Ribosomal protein L34                               |
| SCE509                                           | 01               | Mitochondrial ribosomal protein L34                 |
| SCE005                                           | 01               | Translation initiation factor 2                     |
| SCE243                                           | 01               | Translation initiation factor 1                     |
| SCE228                                           | 01               | Elongation factor TU                                |
| SCE300                                           | 01               | TATA-box binding protein                            |
| SCE163                                           | 01               | Elongation factor Tu GTP binding domain             |
| SCE291                                           | 01               | U3 small nucleolar ribonucleoprotein                |
| SCE386                                           | 01               | Ribonuclease P/MRP subunit, precursor 5             |
| <b>Post-translational processing and sorting</b> |                  |                                                     |
| SCEHYPO2                                         | 02               | Signal sequence receptor                            |
| SCEHYPO4                                         | 02               | Calreticulin                                        |
| SCEHYPO7                                         | 02               | Transport protein Sec61 beta subunit                |
| SCE139                                           | 01               | Similar to Protein disulfide isomerase A6 precursor |
| SCE377                                           | 01               | <i>Oxyranus scutellatus scutellatus</i> PDI         |
| SCE015                                           | 01               | Thioredoxin domain containing protein 1 precursor   |
| SCE438                                           | 01               | Calcium and integrin binding 1                      |
| SCE003                                           | 01               | YME1-like 1 protease                                |
| SCE131                                           | 01               | Putative transporter                                |
| SCE388                                           | 01               | Glutathione transferase zeta 1                      |
| SCE470                                           | 01               | Glutathione S-transferase theta 1                   |
| <b>Protein Modification and Degradation</b>      |                  |                                                     |
| SCE030                                           | 01               | Proteasome maturation factor UMP1                   |
| SCE073                                           | 01               | Ubiquitin A-52 residue ribosomal protein            |
| SCE223                                           | 01               | Proteasome activator rPA28 subunit beta             |
| SCE317                                           | 01               | Polyubiquitin                                       |
| <b>Structural proteins</b>                       |                  |                                                     |
| SCE200                                           | 01               | Torsin A                                            |
| SCE185                                           | 01               | Actin filament, gelsolin-like                       |
| SCE311                                           | 01               | Cytokeratin 19                                      |

|                                            |    |                                                              |
|--------------------------------------------|----|--------------------------------------------------------------|
| SCE444                                     | 01 | Alpha-tubulin                                                |
| <b>Cell regulation and other functions</b> |    |                                                              |
| SCEHYPO3                                   | 03 | Similar to Hypothetical protein FLJ22662 of Gallus gallus    |
| SCEHYPO5                                   | 02 | Thymosin beta variant                                        |
| SCEHYPO6                                   | 03 | Immunoglobulin heavy chain                                   |
| SCE179                                     | 01 | Immunoglobulin M constant region                             |
| SCE366                                     | 01 | Peptidylprolyl isomerase                                     |
| SCE064                                     | 01 | Similar to DnaJ homolog                                      |
| SCE050                                     | 01 | Cyclophilin A                                                |
| SCE041                                     | 01 | Putative thrombin inhibitor                                  |
| SCE384                                     | 01 | Similar to multiple coagulation factor deficiency 2          |
| SCE078                                     | 01 | Chemokine precursor                                          |
| SCE165                                     | 01 | Lens fiber membrane intrinsic protein                        |
| SCE339                                     | 01 | Connective tissue growth factor-like protein                 |
| SCE356                                     | 01 | Poliovirus receptor-related protein                          |
| SCE021                                     | 01 | Serine (or cysteine) proteinase inhibitor                    |
| SCE060                                     | 01 | Similar to Copine III                                        |
| SCE068                                     | 01 | Similar to MGC89718 protein (Xenopus tropicalis)             |
| SCE079                                     | 01 | ATP/ADP antiporter                                           |
| SCE111                                     | 01 | Predicted to similar to 14 kDa phosphohistidine phosphatase  |
| SCE086                                     | 01 | Parvalbumin beta                                             |
| SCE091                                     | 01 | Similar to human neuronal protein                            |
| SCE98                                      | 01 | Similar to small EDRK-rich factor 1                          |
| SCE102                                     | 01 | Mak3p homolog                                                |
| SCE112                                     | 01 | Adaptor protein complex AP-1                                 |
| SCE129                                     | 01 | Similar to tRNA selenocysteine associated protein            |
| SCE167                                     | 01 | Similar to tRNA selenocysteine associated protein isoform 1  |
| SCE175                                     | 01 | Insulin-induced protein                                      |
| SCE183                                     | 01 | Nucleic acid binding protein 2                               |
| SCE188                                     | 01 | Similar to prion protein interacting protein 1               |
| SCE193                                     | 01 | Clathrin                                                     |
| SCE209                                     | 01 | Clathrin adaptor complex small chain                         |
| SCE245                                     | 01 | Apoptotic suppressor                                         |
| SCE227                                     | 01 | GTP binding protein                                          |
| SCE279                                     | 01 | Rab subfamily of small GTPases                               |
| SCE297                                     | 01 | Benzodiazepine receptor                                      |
| SCE349                                     | 01 | Similar to basic leucine zipper and W2 domains 1 isoform3    |
| SCE350                                     | 01 | Progesterone receptor membrane component 2                   |
| SCE357                                     | 01 | Similar to sulfotransferase 1B                               |
| SCE398                                     | 01 | Rho (Ras homology) subfamily of Ras-like small GTPases       |
| SCE399                                     | 01 | Golgi transport 1 homolog B                                  |
| SCE441                                     | 01 | Eukaryotic porin                                             |
| SCE460                                     | 01 | Fibroblast growth factor binding protein                     |
| SCE471                                     | 01 | SH3 domain-containing protein 1A                             |
| SCE125                                     | 01 | ATP synthase D chain                                         |
| SCE187                                     | 01 | Calbindin                                                    |
| SCE072                                     | 01 | B-cell translocation/anti-proliferative gene                 |
| <b>Hypothetical sequences</b>              |    |                                                              |
| SCE387                                     | 01 | Hypothetical/no match                                        |
| SCE027                                     | 01 | Hypothetical-similar to FLJ00261 protein                     |
| SCE037                                     | 01 | Hypothetical-unnamed protein product                         |
| SCE042                                     | 01 | Hypothetical protein TP02_0326                               |
| SC110                                      | 01 | Hypothetical protein product - <i>Paramecium tetraurelia</i> |
| SCE120                                     | 01 | Hypothetical SpoVR-like family protein                       |
| SCE123                                     | 01 | Hypothetical protein - <i>Xenopus tropicalis</i>             |
| SCE189                                     | 01 | Hypothetical-no significant similarity found                 |
| SCE191                                     | 01 | Hypothetical-no significant similarity found                 |

|         |    |                                                                     |
|---------|----|---------------------------------------------------------------------|
| SCE190  | 01 | Hypothetical protein-no significant similarity found                |
| SCE226  | 01 | Hypothetical peroxiredoxin 6 like protein                           |
| SCE277  | 01 | Hypothetical-no significant similarity found                        |
| SCE299  | 01 | Hypothetical-no significant similarity found                        |
| SCE308  | 01 | Hypothetical Leucine Rich Repeat family protein                     |
| SCE313  | 01 | Hypothetical nitrous-oxide reductase                                |
| SCE354  | 01 | Hypothetical protein for <i>-Xenopus laevis</i>                     |
| SCE358  | 01 | Hypothetical KIAA0491- <i>Homo sapiens</i>                          |
| SCE393  | 01 | Hypothetical-no significant similarity found.                       |
| SCE397  | 01 | Hypothetical (XAP-5 protein)- <i>Rattus norvegicus</i>              |
| SCE437  | 01 | Hypothetical protein                                                |
| SCE265  | 01 | Hypothetical-no significant similarity found                        |
| SCE269  | 01 | Hypothetical-no significant similarity found.                       |
| SCE318  | 01 | Hypothetical protein pEA28_0- <i>Erwinia amylovora</i>              |
| SCE365  | 01 | Hypothetical to ribosomal protein S14- <i>Homo sapiens</i>          |
| SCE 137 | 01 | Hypothetical protein OsJ_008985- <i>Oryza sativa</i>                |
| SCE147  | 01 | Hypothetical IgM heavy chain like                                   |
| SCE081  | 01 | Hypothetical-no significant similarity found                        |
| SCE053  | 01 | Hypothetical-no significant similarity found.                       |
| SCE051  | 01 | Hypothetical-no significant similarity found                        |
| SCE136  | 01 | Hypothetical-no significant similarity found                        |
| SCE182  | 01 | Hypothetical proline/serine-rich coiled-coil 2- <i>Mus musculus</i> |
| SCE218  | 01 | Hypothetical- <i>Homo sapiens</i> insulin induced gene 1            |
| SCE237  | 01 | Hypothetical solute carrier family 30                               |
| SCE246  | 01 | Hypothetical-no significant similarity found                        |
| SCE250  | 01 | Hypothetical hCG2036582, isoform CRA_b- <i>Homo sapiens</i>         |
| SCE251  | 01 | Hypothetical-no significant similarity found                        |
| SCE252  | 01 | Hypothetical-no significant similarity found                        |
| SCE273  | 01 | Hypothetical protein for MGC:80952)- <i>Xenopus laevis</i>          |
| SCE414  | 01 | Hypothetical-no significant similarity found                        |
| SCE424  | 01 | Hypothetical-no significant similarity found                        |
| SCE494  | 01 | Hypothetical similar to ribosomal protein L32 isoform 2             |
| SCE402  | 01 | Hypothetical-no significant similarity found.                       |
