# Supplementary material for: The venom gland transcriptome of the Desert Massasauga Rattlesnake (Sistrurus catenatus edwardsii): towards an understanding of venom composition among advanced snakes (Superfamily Colubroidea)
Source: PubMed Central journal article supplement (PMC2242803; doi:10.1186/1471-2199-8-115), 2007-12-20
Supplement: 1471-2199-8-115-S4.pdf [file 1471-2199-8-115-S4.pdf]

DQ464268 GCCTAGCCGTAAAATACAATTTAACTACCAATTGTCCGCCAAACAACACTACGAGTACTACTTAAAAC  
AF057227 GCCTAGCCGTAAAATACAATTTAACTACCAATTGTCCGCCAAACAACACTACGAGTACTACTTAAAAC  
\*\*\*\*\*

DQ464268 TTAAAAGACTTGACGGTGCTTCACCACGCCCTAGAGGAGCCTGTCTAGCAACCGATAATCCACGAT  
AF057227 TTAAAAGACTTGACGGTGCTTCACCACGCCCTAGAGGAGCCTGTCTAGCAACCGATAATCCACGAT  
\*\*\*\*\*

DQ464268 TAACCCAGCCCCCCTAGCCCAACAGTCTATATACCGCCGTCGCCAGCTTACCTTGTAAGAAAT  
AF057227 TAACCCAGCCCCCCTAGCCCAACAGTCTATATACCGCCGTCGCCAGCTTACCTTGTAAGAAAT  
\*\*\*\*\*

DQ464268 AAAGTAAGCCAAACAGTAATTTCAACTAAAACGACAGGTCGAGGTGTAACATAATGAGGGGGACTAA  
AF057227 AAAGTAAGCCAAACAGTAATTTCAACTAAAACGACAGGTCGAGGTGTAACATAATGAGGGGGACTAA  
\*\*\*\*\*

DQ464268 GATGGGCTACATTCTCCTGACTGAGGATACGAACAATACTATGAAATTAGTATTTAAAGGCGGATT  
AF057227 GATGGGCTACATTCTCCTGACTGAGGATACGAACAATACTATGAAATTAGTATTTAAAGGCGGATT  
\*\*\*\*\*

DQ464268 TAGCAGTAAGATAAGAATAAAATACTTAACTGAACATAACGCAATGAAGCGGTACACACCGCCCG  
AF057227 TAGCAGTAAGATAAGAATAAAATACTTAACTGAACATAACGCAATGAAGCGGTACACACCGCCCG  
\*\*\*\*\*

DQ464268 TCACCCCTGCTAACACAACACATAGTTAAATAAAACAACCCAAAAAAAAAAAAAAAAAAAAAAAAAAAA  
AF057227 TCACCCCTGCTAACAC-----  
\*\*\*\*\*
