# Supplementary material for: The venom gland transcriptome of the Desert Massasauga Rattlesnake (Sistrurus catenatus edwardsii): towards an understanding of venom composition among advanced snakes (Superfamily Colubroidea)
Source: PubMed Central journal article supplement (PMC2242803; doi:10.1186/1471-2199-8-115), 2007-12-20
Supplement: 1471-2199-8-115-S5.pdf [file 1471-2199-8-115-S5.pdf]

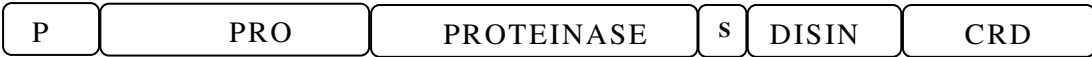

|                  | 11                | 103             | 111             |             |             |             |              |            |           |           |          |         |          |        |        |        |         |         |      |       |       |       |       |       |      |    |    |   |   |   |   |   |   |   |      |      |      |      |      |       |      |   |   |   |   |   |   |   |   |   |   |     |      |
|------------------|-------------------|-----------------|-----------------|-------------|-------------|-------------|--------------|------------|-----------|-----------|----------|---------|----------|--------|--------|--------|---------|---------|------|-------|-------|-------|-------|-------|------|----|----|---|---|---|---|---|---|---|------|------|------|------|------|-------|------|---|---|---|---|---|---|---|---|---|---|-----|------|
| DQ464249         | LDAKKYVEFVVVLDHGM | YTKYKDDLDKIKTRI | YIEIVNTMNEIYIPL | LNIRVALVRL  | LEIWSNGDLIN | VSSAANVTLDS | FRNWRVTDLLRR | KKSHDNAQLL | TTD       |           |          |         |          |        |        |        |         |         |      |       |       |       |       |       |      |    |    |   |   |   |   |   |   |   |      |      |      |      |      |       |      |   |   |   |   |   |   |   |   |   |   |     |      |
| Jararhagin       | -DPYKIEFFVVDQGT   | VTKNGDLDKIKARM  | YELANIVNEIFRY   | LYMHVALVGL  | EIWSNGDKIT  | VKPDVDYTL   | NSFAEWRKTD   | LLTRKKHD   | NAQLLTAID | PIIIa     |          |         |          |        |        |        |         |         |      |       |       |       |       |       |      |    |    |   |   |   |   |   |   |   |      |      |      |      |      |       |      |   |   |   |   |   |   |   |   |   |   |     |      |
| Bothropasin      | -NPFYVELFIVVDQ    | GMVTKNNGDLDK    | IKARMYELANIV    | NEILRYLYMHA | ALVGLIWSNG  | DKITVKPDV   | DYTLNSFAE    | WRKTDLLTR  | KKHDNAQLL |           |          |         |          |        |        |        |         |         |      |       |       |       |       |       |      |    |    |   |   |   |   |   |   |   |      |      |      |      |      |       |      |   |   |   |   |   |   |   |   |   |   |     |      |
| Acurhagin        | -DPFKYVETVVVVD    | KAMVTKYNGDLD    | KIKTMYEAANN     | MNEMRYMFRV  | VVMVGLI     | IWTEEDKI    | TVKPDVDY     | TNLSFAE    | WRKTYLLA  |           |          |         |          |        |        |        |         |         |      |       |       |       |       |       |      |    |    |   |   |   |   |   |   |   |      |      |      |      |      |       |      |   |   |   |   |   |   |   |   |   |   |     |      |
| Catrocollastatin | -NPRFVELFLVVD     | KAMVTKNNGDLD    | KIKTRMYEIV      | NTVNEIYRYM  | IHVALVGL    | EIWSNEDKI   | TVKPEAGY     | TNLSFAE    | WRKTDLLTR | KKHDNAQLL | TAID     |         |          |        |        |        |         |         |      |       |       |       |       |       |      |    |    |   |   |   |   |   |   |   |      |      |      |      |      |       |      |   |   |   |   |   |   |   |   |   |   |     |      |
| DQ464255         | LNAKKYVKLFVADY    | VMYLKYGRNLT     | AVRTRMYD        | TNVNVI      | TPYHRMNI    | HVALVGL     | EIWSNRDKI    | IVQSSP     | DVTLDL    | FAKWRATD  | LLRRKSHD | NAQLLT  | GIN      |        |        |        |         |         |      |       |       |       |       |       |      |    |    |   |   |   |   |   |   |   |      |      |      |      |      |       |      |   |   |   |   |   |   |   |   |   |   |     |      |
| VAP1             | LNAKKYVKLFVADY    | IMYLKYGRNLT     | AVRTRMYD        | IVNVI       | TPYHRMNI    | HVALVGL     | EIWSNTDKI    | IVQSSA     | DVTLDL    | FAKWRATD  | LLRRKSHD | NAQLLT  | GIN      |        |        |        |         |         |      |       |       |       |       |       |      |    |    |   |   |   |   |   |   |   |      |      |      |      |      |       |      |   |   |   |   |   |   |   |   |   |   |     |      |
| HV1              | LNAKKYVKFLVADH    | IMYLKYGRNLT     | LRTRMFD         | TNVNVI      | QILQRINH    | VALIGIEI    | WSKEDKI      | IVQSPD     | VTLKLF    | ATWRESV   | LLRRKH   | NDNAHLL | TGIN     |        |        |        |         |         |      |       |       |       |       |       |      |    |    |   |   |   |   |   |   |   |      |      |      |      |      |       |      |   |   |   |   |   |   |   |   |   |   |     |      |
| Halysase         | LNAKKYVKLVMDY     | IMYLKYGRNLT     | AVRTRMYD        | IVNVI       | TPYHRMNI    | HVALVGL     | EIWSNEDKI    | TVKPEA     | SNVTLD    | LFATWRE   | TDL      | LLRRKH  | SHDNAQLL | TGIN   |        |        |         |         |      |       |       |       |       |       |      |    |    |   |   |   |   |   |   |   |      |      |      |      |      |       |      |   |   |   |   |   |   |   |   |   |   |     |      |
| VLAIP-A          | LNSPKYIKLVIVADY   | IMFLKYGRSLIT    | IRTRIE          | IVNINL      | VNIYRVLN    | IYIALLGL    | EIWNNGDK     | INVLPE     | TKVTL     | DLFGK     | WRERD    | LLNR    | RRKH     | DNAQLL | TDIN   |        |         |         |      |       |       |       |       |       |      |    |    |   |   |   |   |   |   |   |      |      |      |      |      |       |      |   |   |   |   |   |   |   |   |   |   |     |      |
| VLAIP-B          | LKSKEYVELVIVADY   | IMFWKYDRSL      | STIRTRIE        | IVNTLN      | VIRFLNI     | YIALVA      | VEIWSKG      | DLINVT     | SSAYD     | TLDSFG    | EWRE     | RDL     | LN       | RRKH   | RNAQLL | TGIN   |         |         |      |       |       |       |       |       |      |    |    |   |   |   |   |   |   |   |      |      |      |      |      |       |      |   |   |   |   |   |   |   |   |   |   |     |      |
| Stejnihagin-A    | --PRRYVLAIVADR    | RRMYMKHQK       | NLK---          | PWVFQ       | MVNSVHQI    | YRSMNV      | LIALVY       | LNIVK      | KNDKIT    | VQSASD    | VTLD     | DLFAE   | WRET     | VLL    | RRK    | KHDCAH | LLTAID  |         |      |       |       |       |       |       |      |    |    |   |   |   |   |   |   |   |      |      |      |      |      |       |      |   |   |   |   |   |   |   |   |   |   |     |      |
| Stejnihagin-B    | --PRRYVLAIVADR    | HRMYTKHK        | NLK---          | PWVFQ       | MVNSVHQI    | YRSMNV      | LIALVY       | LNIVK      | KNDKIT    | VQSASD    | VTLD     | DLFGN   | WRET     | VLL    | RRK    | RHDCA  | QLLTAID |         |      |       |       |       |       |       |      |    |    |   |   |   |   |   |   |   |      |      |      |      |      |       |      |   |   |   |   |   |   |   |   |   |   |     |      |
| HR1B             | --PRRYIKLAIVVD    | HGIVTKHGH       | NLKKIRKWI       | YQLVNT      | INNIYR      | SLNILV      | ALVYLE       | IWSQ       | NKITV     | QSASN     | VTLD     | DLFGD   | WRES     | VLL    | KKQ    | RSHDCA | QLLTTID |         |      |       |       |       |       |       |      |    |    |   |   |   |   |   |   |   |      |      |      |      |      |       |      |   |   |   |   |   |   |   |   |   |   |     |      |
| DQ464251         | --TKRYVELVIVAD    | HGMFMKHN        | --ETLRT         | WVFM        | VNTINEI     | YIPLNIR     | FALVGL       | EIWSNGDKI  | TVQSSA    | HNTLH     | LFGN     | WRK     | RVL      | KKK    | KHD    | NAQLL  | TSID    |         |      |       |       |       |       |       |      |    |    |   |   |   |   |   |   |   |      |      |      |      |      |       |      |   |   |   |   |   |   |   |   |   |   |     |      |
| DQ464250         | LNNFRYIELVIVADY   | RMFTKYNRKL      | TEVKTWVYE       | IVNTLNE     | IYRYLIR     | VALVGL      | EIWSNGD      | LSNVTLS    | ADDTL     | DSFG      | EWKR     | DLL     | RRK      | SHG    | NAQLL  | TAID   |         |         |      |       |       |       |       |       |      |    |    |   |   |   |   |   |   |   |      |      |      |      |      |       |      |   |   |   |   |   |   |   |   |   |   |     |      |
| Kaouthiagin      | LNAKKEYEFYIV      | DNRMYRYNYD      | NLTPAIR         | RVYEMINA    | VNTKFR      | PLKI        | HIALVGL      | EIWSNEDK   | FEVKA     | SVTLK     | SFREW    | QTVL    | LL       | RRK    | RND    | NAQLL  | TGIN    |         |      |       |       |       |       |       |      |    |    |   |   |   |   |   |   |   |      |      |      |      |      |       |      |   |   |   |   |   |   |   |   |   |   |     |      |
| HF3              | -NHKYYIELVILADY   | RMVTKNNGDL      | GKIRTKI         | YEVNIN      | LNEIFRY     | LYRIR       | ALVGL        | EIWSNAD    | LSNVTLS   | ADDTL     | ASFG     | TWR     | GT       | VLL    | KKR    | SHD    | NAQLL   | TAID    |      |       |       |       |       |       |      |    |    |   |   |   |   |   |   |   |      |      |      |      |      |       |      |   |   |   |   |   |   |   |   |   |   |     |      |
| Berythracivase   | LDAKKYVEFVVVLDHGM | YKYYKDDLDKIKRRI | YIEIVNTMNE      | FIPLNIV     | ALVGL       | EIWSKGDK    | INVTSE       | SWFTL      | ILFTN     | WRGAD     | LLRRK    | SHD     | NAQLL    | TNTD   |        |        |         |         |      |       |       |       |       |       |      |    |    |   |   |   |   |   |   |   |      |      |      |      |      |       |      |   |   |   |   |   |   |   |   |   |   |     |      |
| Ecarin           | FE-KKFIELVVVDH    | SMVTKYNN        | DSAIR           | TWIEML      | NTVNEI      | YIPLNIR     | VALVGL       | EWNGD      | LINVT     | STAD      | TLHS     | FG      | EW       | RAS    | DL     | LN     | RRKH    | DHAQLL  | TNVT |       |       |       |       |       |      |    |    |   |   |   |   |   |   |   |      |      |      |      |      |       |      |   |   |   |   |   |   |   |   |   |   |     |      |
| Atrolysin        | --TKRYVELVIVADR   | HRMFTKYNGNL     | KKIRKWI         | YQIVNT      | INEIYI      | PLNIR       | VALVRL       | EIWSNGD    | LIDVT     | SAANVT    | LKSF     | GN      | WR       | VTL    | LL     | RRK    | SHDNA   | QLLTAID |      |       |       |       |       |       |      |    |    |   |   |   |   |   |   |   |      |      |      |      |      |       |      |   |   |   |   |   |   |   |   |   |   |     |      |
| HR1A             | LNNFRFIELVIVADY   | RMFTKFN         | SNLNE           | VKTWVYE     | IVNTLNE     | IYRYLYR     | VALVLE       | VWSNGD     | LSVTL     | LSAYD     | TLDS     | FG      | EW       | KRD    | LL     | RRK    | SHD     | NAQLL   | TAID |       |       |       |       |       |      |    |    |   |   |   |   |   |   |   |      |      |      |      |      |       |      |   |   |   |   |   |   |   |   |   |   |     |      |
|                  | 112               |                 |                 | 181         |             | 195         |              | 211        |           |           |          |         |          |        |        |        |         |         |      |       |       |       |       |       |      |    |    |   |   |   |   |   |   |   |      |      |      |      |      |       |      |   |   |   |   |   |   |   |   |   |   |     |      |
| DQ464249         | FDGDTVGLAYM       | RSMCQPRGS       | VGVIE           | QHSTIN      | LLMAV       | TMAHEM      | GHNLGMS      | HGDNQ      | CHCGAP    | SCIMADR   | LSHQ     | PSTQ    | FSD      | CESEK  | YCR    | TYL    | INSR    | PQCIL   | INEP |       |       |       |       |       |      |    |    |   |   |   |   |   |   |   |      |      |      |      |      |       |      |   |   |   |   |   |   |   |   |   |   |     |      |
| Jararhagin       | FNGPTIGYAYIG      | SMCHPKRS        | VGIVQD          | YSPIN       | LVVAVI      | MAHEM       | GHNLGI       | HHD        | TGSC      | SCGD      | YPCIM    | GPTI    | SN       | EP     | SK     | FFSN   | CYIQ    | WDF     | IM   | NHN   | PECI  | INEP  |       |       |      |    |    |   |   |   |   |   |   |   |      |      |      |      |      |       |      |   |   |   |   |   |   |   |   |   |   |     |      |
| Bothropasin      | FNGPTIGYAYIG      | SMCHPKRS        | VAVI            | VEDYSP      | INLVVAVI    | MAHEM       | GHNLGI       | HHD        | TDFC      | SCGD      | YPCIM    | GPTI    | SN       | EP     | SK     | FFSN   | CYIQ    | WDF     | IM   | KEN   | PQCIL | INEP  |       |       |      |    |    |   |   |   |   |   |   |   |      |      |      |      |      |       |      |   |   |   |   |   |   |   |   |   |   |     |      |
| Acurhagin        | FRGSIIGYAYIG      | SMCHPKRS        | VGI             | IQDYSP      | INLVVAVI    | MAHEM       | GHNLGI       | HHD        | DGYCY     | CGGYPCIM  | GPSI     | SP      | EP       | SK     | FFSN   | CYIQ   | WDF     | IM      | NHN  | PECI  | DNEP  |       |       |       |      |    |    |   |   |   |   |   |   |   |      |      |      |      |      |       |      |   |   |   |   |   |   |   |   |   |   |     |      |
| Catrocollastatin | LDR-VIGLAYV       | GSMCHPKR        | STGII           | QDYSE       | INLVVAVI    | MAHEM       | GHNLGIN      | HDS        | SGYCS     | CGDYACIM  | RPEI     | S       | PEP      | ST     | FFSN   | CYIF   | WDF     | IM      | NHN  | PECI  | INEP  |       |       |       |      |    |    |   |   |   |   |   |   |   |      |      |      |      |      |       |      |   |   |   |   |   |   |   |   |   |   |     |      |
| DQ464255         | FNGPTAGLAYLGGI    | CNTMYSAGI       | VQDHSK          | IHHLVA      | IAMAHEM     | GHNLGMD     | HDKD         | CTC        | GRTRP     | CVMAG     | LSL      | CEAS    | FL       | SD     | C      | SQ     | KEH     | REF     | L    | KNMP  | QCIL  | LKPP  |       |       |      |    |    |   |   |   |   |   |   |   |      |      |      |      |      |       |      |   |   |   |   |   |   |   |   |   |   |     |      |
| VAP1             | FNGPTAGLAYLGGI    | CKPMYSAGI       | VQDHNK          | IHHLVA      | IAMAHEM     | GHNLGMD     | HDKD         | CTC        | CRAKA     | CVMAG     | LSL      | CDAS    | Y        | SD     | C      | SR     | QEH     | RAF     | L    | KNMP  | QCIL  | LKPP  |       |       |      |    |    |   |   |   |   |   |   |   |      |      |      |      |      |       |      |   |   |   |   |   |   |   |   |   |   |     |      |
| HV1              | FNGPTAGLAYLGGI    | CNPMSAGI        | VQDHNK          | IHHLVA      | IAMAHEM     | GHNLGMD     | HDKD         | CTC        | CGAKS     | CVMAG     | LSL      | CDAS    | Y        | SD     | C      | SR     | KEH     | QAF     | L    | KNMP  | QCIL  | LKPP  |       |       |      |    |    |   |   |   |   |   |   |   |      |      |      |      |      |       |      |   |   |   |   |   |   |   |   |   |   |     |      |
| Halysase         | FNGPTAGLYVGS      | MCDPQYSAGI      | VQDHNK          | VNLFV       | AVIAMAHEM   | GHNLGMD     | HDEIH        | CTC        | CGAKS     | CIMSG     | TLSC     | CEAS    | IR       | SN     | C      | SRE    | EH      | QY      | L    | KNMP  | QCIL  | LNKP  |       |       |      |    |    |   |   |   |   |   |   |   |      |      |      |      |      |       |      |   |   |   |   |   |   |   |   |   |   |     |      |
| VLAIP-A          | FNGPSAGRGFV       | GRMCQPKYS       | VGIVQD          | HSAI        | YLLVAS      | AMAHEM      | GHNLGMD      | HDRID      | CTC       | CGAKS     | CIMSG    | ILRC    | ETS      | Y      | SD     | C      | SRE     | EH      | RK   | YL    | KNMP  | QCIL  | LNKP  |       |      |    |    |   |   |   |   |   |   |   |      |      |      |      |      |       |      |   |   |   |   |   |   |   |   |   |   |     |      |
| VLAIP-B          | FNGPTIGRAHIA      | SMCNKLS         | VGIVQNY         | TEIN        | LVNAI       | MAHEL       | GHNLGI       | SHD        | GNQNC     | --HTC     | IMSA     | V       | SN       | PP     | SERF   | SN     | C       | SE      | DY   | HQ    | SF    | LTAYN | PQCIL | LNAP  |      |    |    |   |   |   |   |   |   |   |      |      |      |      |      |       |      |   |   |   |   |   |   |   |   |   |   |     |      |
| Stejnihagin-A    | FDGPTIGRAHV       | SSVCDPKR        | STGIVQNY        | TEIN        | LVNAI       | MAHEL       | GHNLGMD      | H          | DNQNC     | --HAC     | IMSA     | V       | SN       | PP     | SERF   | SG     | C       | SM      | G    | Y     | Q     | T     | FTAYN | PQCIL | LNAL |    |    |   |   |   |   |   |   |   |      |      |      |      |      |       |      |   |   |   |   |   |   |   |   |   |   |     |      |
| Stejnihagin-B    | FDGPTIGKAYT       | ASMCNPKRS       | VQDHSK          | IHHLVA      | IAMAHEM     | GHNLGMD     | HDEIH        | CTC        | CGAKS     | CIMSG     | TLSC     | CEAS    | IR       | SN     | C      | SRE    | EH      | QY      | L    | KNMP  | QCIL  | LNKP  |       |       |      |    |    |   |   |   |   |   |   |   |      |      |      |      |      |       |      |   |   |   |   |   |   |   |   |   |   |     |      |
| HR1B             | FDGRTVGLAHV       | SSMCNQK         | LSTGVI          | QDHS        | AINLV       | MAV         | TMAHEL       | GHNLGMD    | HDIKY     | CTCGA     | PA       | CVM     | G        | N      | L      | S      | E       | Q       | P    | S     | Y     | G     | F     | SN    | C    | S  | Q  | N | Q | Y | T | F | I | N | Y    | N    | P    | QCIL | INEP |       |      |   |   |   |   |   |   |   |   |   |   |     |      |
| DQ464251         | FNGTTIGLAHV       | ASMCEL          | KRSTG           | VQDHS       | PINLV       | VAVI        | MAHEM        | GHNLGI     | RH        | DKCY      | CTCGY    | SCIM    | SA       | V      | LSH    | Q      | A       | S       | Y    | F     | SN    | C     | S     | Y     | N    | Q  | Y  | W | N | Y | I | N | F | Y | K    | P    | QCIL | INEP |      |       |      |   |   |   |   |   |   |   |   |   |   |     |      |
| DQ464250         | LNGTAVGAIY        | PGSLCT-Q        | RSV             | FVVQD       | YNRRMS      | LVASTM      | THEL         | GHNLGI     | H         | DEAS      | CICIP    | GP      | CIM      | L      | K      | R      | T       | A       | -    | Q     | F     | S     | S     | C     | S    | I  | R  | D | Y | Q | E | Y | L | L | R    | D    | R    | P    | QCIL | LNKP  |      |   |   |   |   |   |   |   |   |   |   |     |      |
| HF3              | FDGTTIGIANI       | ASMCNQN         | KSVG            | VMDYSP      | INLVVAVI    | MAHEM       | GHNLGIN      | H          | D         | TGSC      | SCGD     | YPCIM   | AP       | E      | S      | D      | P       | S       | E    | L     | F     | SN    | C     | S     | K    | Q  | A  | Y | Q | R | Y | L | N | Y | K    | P    | QCIL | INEP |      |       |      |   |   |   |   |   |   |   |   |   |   |     |      |
| Berythracivase   | FDGSTIGRAHIG      | SMCHPY          | LSVGI           | IQDYSP      | VNLLV       | ASTMAHEM    | GHNLGM       | H          | D         | N         | D        | CTCGA   | P        | CV     | M      | A      | A       | I       | S    | K     | D     | P     | S     | K     | L    | F  | SN | C | S | Q | E | Y | Q | R | K    | Y    | L    | I    | KNR  | PQCIL | LNKP |   |   |   |   |   |   |   |   |   |   |     |      |
| Ecarin           | LDHSTLGI          | TFVYGM          | CKSD            | RSVELI      | L           | D           | YSNI         | TFN        | MAYII     | AHEM      | GHSL     | G       | M        | L      | H      | D      | T       | K       | F    | CTCGA | K     | P     | CIM   | F     | G    | K  | E  | S | I | P | P | P | K | E | F    | S    | S    | C    | S    | Y     | D    | Q | N | K | Y | L | L | K | N | P | K | CIL | LDPP |
| Atrolysin        | LDEETLGLAP        | LGTMC           | PKLS            | GIVQD       | HSPIN       | LLVAVI      | MAHEL        | GHNLGM     | V         | DENR      | CHC      | STPA    | CV       | M      | CA     | V      | L       | R       | Q    | R     | P     | S     | Y     | E     | F    | SD | C  | S | L | N | H | Y | T | F | I    | N    | Y    | N    | P    | QCIL  | INEP |   |   |   |   |   |   |   |   |   |   |     |      |
| HR1A             | FNGTTIGLAHV       | ASMCDPK         | STGIVQD         | YSRNL       | VAVI        | MAHEM       | GHNLGI       | RH         | D         | REN       | CTCHANS  | CIMSA   | V        | S      | D      | Q      | P       | S       | K    | Y     | F     | SN    | C     | S     | H    | V  | Q  | Y | W | I | N | D | E | P | QCIL | INEP |      |      |      |       |      |   |   |   |   |   |   |   |   |   |   |     |      |
