# Supplementary material for: The venom gland transcriptome of the Desert Massasauga Rattlesnake (Sistrurus catenatus edwardsii): towards an understanding of venom composition among advanced snakes (Superfamily Colubroidea)
Source: PubMed Central journal article supplement (PMC2242803; doi:10.1186/1471-2199-8-115), 2007-12-20

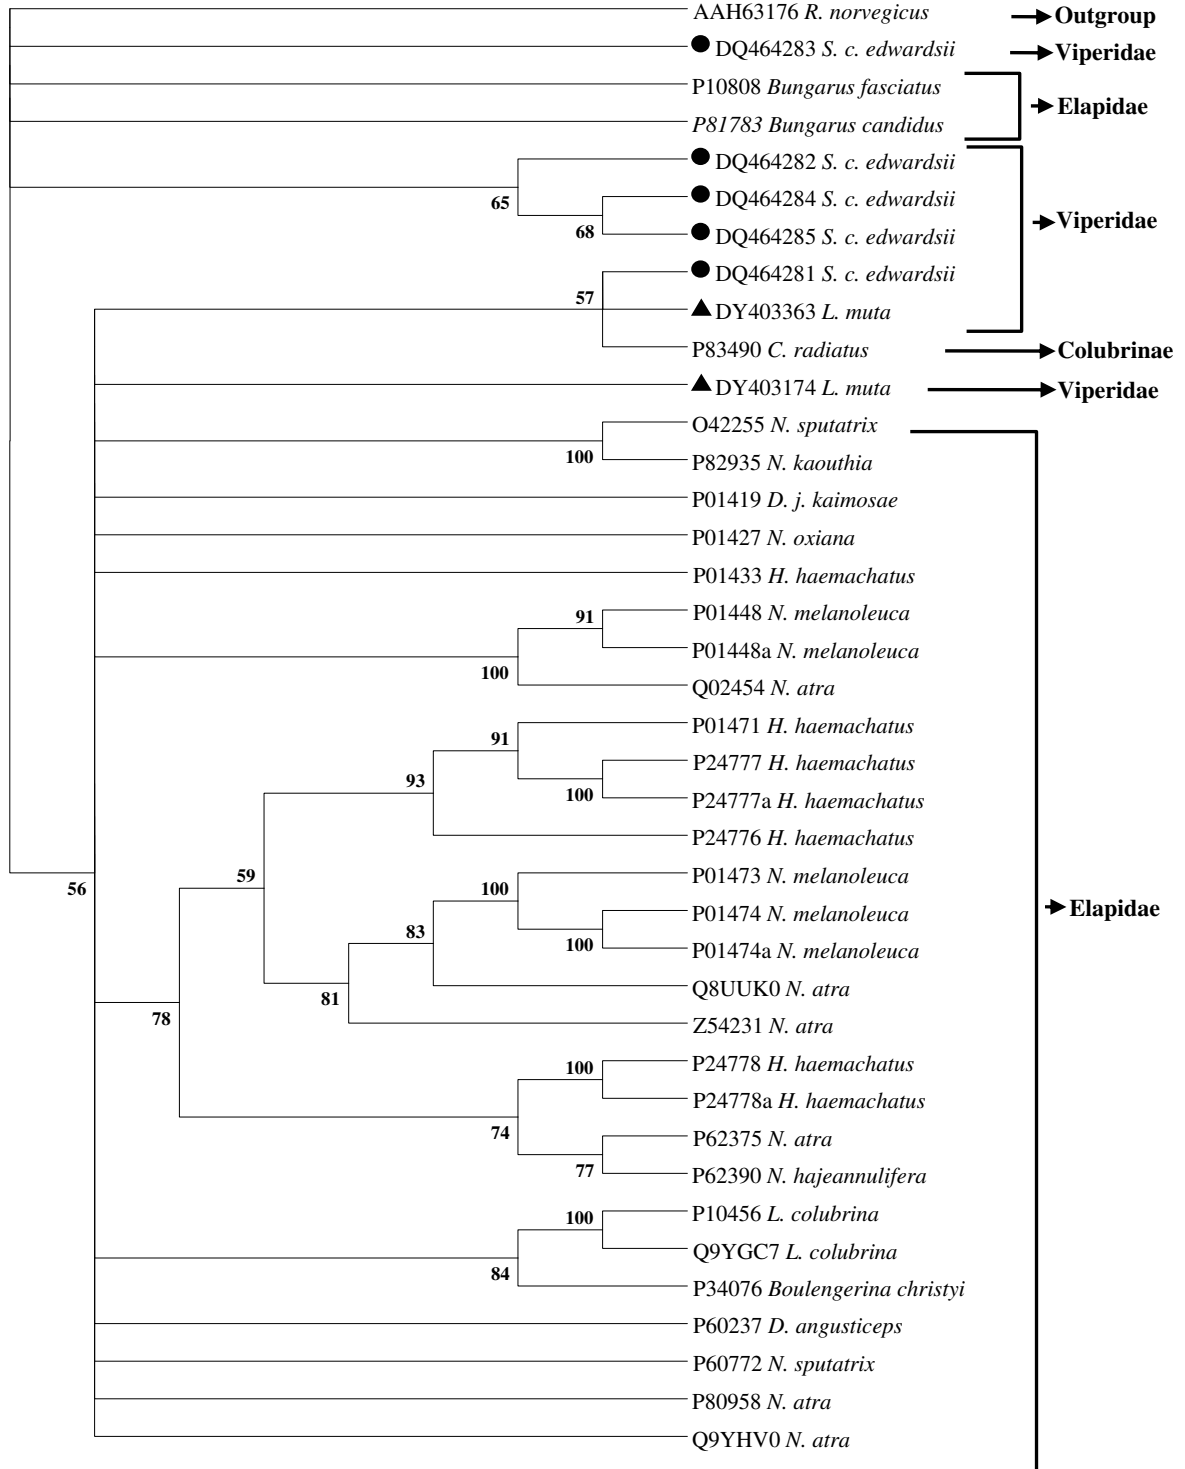

Supplement: 1471-2199-8-115-S6.pdf [file 1471-2199-8-115-S6.pdf]
